# Supplementary material for: Water-Soluble Copper Ink for the Inkjet Fabrication of Flexible Electronic Components
Source: MDPI journal article supplement (doi:10.3390/ma14092218), 2021-04-26
Supplement: s1 [file s1]

# Water-Soluble Copper Ink for the Inkjet Fabrication of Flexible Electronic Components

Nabi S. Shabanov <sup>1,2</sup>, Kamil Sh. Rabadanov <sup>1</sup>, Sagim I. Suleymanov <sup>1</sup>, Akhmed M. Amirov <sup>1</sup>, Abdulgalim B. Isaev <sup>2</sup>, Dinara S. Sobola <sup>2,3,4,\*</sup>, Eldar K. Murliev <sup>1</sup> and Gulnara A. Asvarova <sup>1</sup>

<sup>1</sup> Analytical Center for Collective Use, Dagestan Federal Research Centre of the Russian Academy of Sciences, 367001 Makhachkala, Russia; shabanov.nabi@yandex.ru (N.S.S.); rksh@mail.ru (K.S.R.); s.sagim.i@yandex.ru (S.I.S.); aamirov@mail.ru (A.M.A.); murliev@mail.ru (E.K.M.); konfetka080467@mail.ru (G.A.A.)

<sup>2</sup> Department of Inorganic Chemistry and Chemical Ecology, Dagestan State University, St. M. Gadjieva 43-a, Dagestan Republic, 367015 Makhachkala, Russia; abdul-77@yandex.ru

<sup>3</sup> Department of Ceramics and Polymers, Faculty of Mechanical Engineering, Brno University of Technology, Technická 2, 616 69 Brno, Czech Republic

<sup>4</sup> Department of Physics, Faculty of Electrical Engineering and Communication, Brno University of Technology, Technická 2848/8, 616 00 Brno, Czech Republic

\* Correspondence: sobola@vutbr.cz

**Table S1.** Images of scanning electron microscopy for the samples tested using the EDX analysis. .

|       |  | Sample                                                                              |                                                                                     |                                                                                     |                                                                                      |                                                                                       |                                                                                       |
|-------|--|-------------------------------------------------------------------------------------|-------------------------------------------------------------------------------------|-------------------------------------------------------------------------------------|--------------------------------------------------------------------------------------|---------------------------------------------------------------------------------------|---------------------------------------------------------------------------------------|
| T, °C |  | Cu(OOCH) <sub>2</sub>                                                               |                                                                                     | [Cu(NH <sub>3</sub> ) <sub>2</sub> ](OOCH) <sub>2</sub>                             |                                                                                      | [Cu(C <sub>2</sub> H <sub>6</sub> NH) <sub>2</sub> ](OOCH) <sub>2</sub>               |                                                                                       |
| 150   |  | 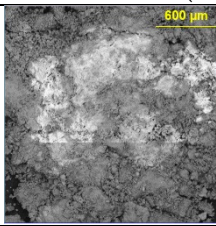 |  |  |  |  |  |
| 130   |  |  |  |  |  |  |  |
| 110   |  |  |  |  |  |  |  |
| 25    |  |  |  |  |  |  |  |
